# Supplementary material for: Modeling axonal regeneration by changing cytoskeletal dynamics in stem cell-derived motor nerve organoids
Source: PubMed Central journal article supplement (PMC8827082; doi:10.1038/s41598-022-05645-6), 2022-02-08
Supplement: 41598_2022_5645_MOESM1_ESM.pdf [file 41598_2022_5645_MOESM1_ESM.pdf]

Supplementary information

Raw Data for Figure 1f

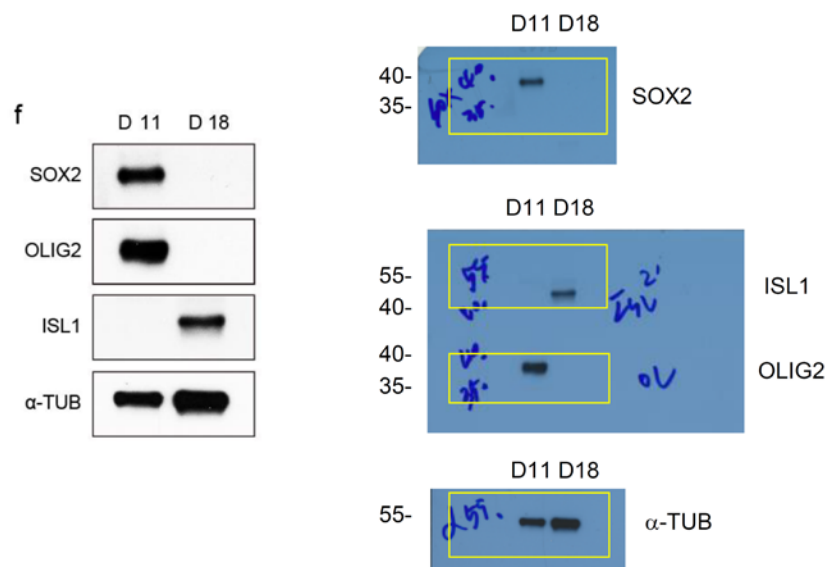

**Sup. Fig. 1.** The original images for blots in Fig. 1f

The blots were trimmed before hybridization with antibodies. Individual trimmed original blots were marked in yellow boxes.

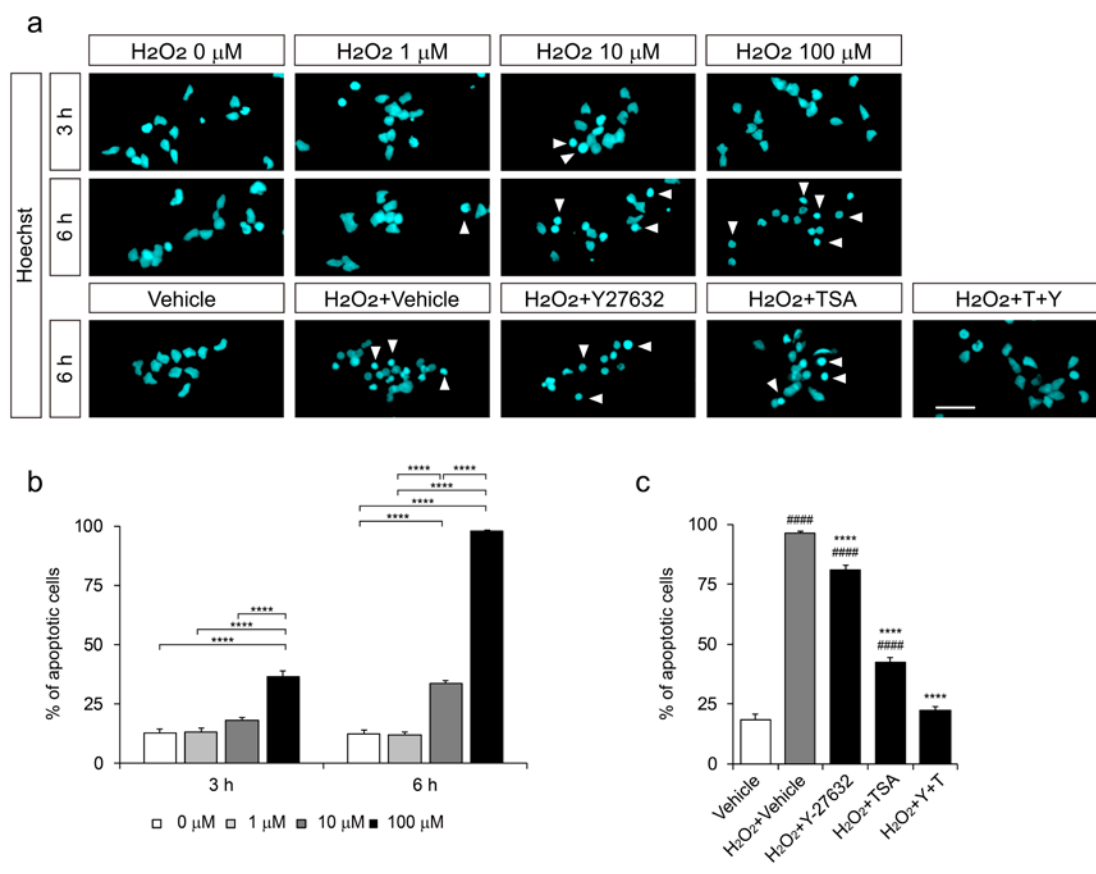

**Sup. Fig. 2.** Assessment of apoptotic nuclei after the oxidative stress

(a) Representative images of Hoechst-stained cell bodies in various conditions of hydrogen peroxide and drug treatment. Arrowheads indicate bright punctate apoptotic nuclei. (b, c) Quantification of apoptotic cell bodies (n = 27 images per condition from 3 independent experiments). Error bars represent s.e.m.; \*\*\*\*p<0.0001; one-way ANOVA with Tukey's test (b). Error bars represent s.e.m.; #####p<0.0001 versus Vehicle; \*\*\*\*p<0.0001 versus H<sub>2</sub>O<sub>2</sub>+Vehicle, one-way ANOVA test with Tukey's test (c). Scale bar: 10 μm.
